# Supplementary material for: Magnetic MOF-808 as a novel adsorbent for toxic metal removal from aqueous solutions
Source: Royal Society of Chemistry journal article supplement (doi:10.1039/d2va00010e), 2022-01-01
Supplement: d2va00010e1.pdf [file d2va00010e1.pdf]

## Magnetic MOF-808 as a novel adsorbent for toxic metal removal from aqueous solutions

Roxana Paz<sup>a</sup>, Herlys Viltres<sup>b\*</sup>, Nishesh Kumar Gupta<sup>c,d</sup>, Adolfo Romero-Galarza<sup>e</sup>, Carolina

Leyva<sup>a\*</sup>

<sup>a</sup>*Instituto Politécnico Nacional, Centro de Investigación en Ciencia Aplicada y Tecnología Avanzada, CDMX, México;* <sup>b</sup>*School of Engineering Practice and Technology, McMaster University, Ontario, Canada;* <sup>c</sup>*University of Science and Technology (UST), Daejeon, Republic of Korea;* <sup>d</sup>*Department of Land, Water, and Environment Research, Korea Institute of Civil Engineering and Building Technology (KICT), Goyang, Republic of Korea;* <sup>e</sup>*Department of Chemical Engineering, School of Chemistry, Universidad Autónoma de Coahuila, México*

### Section S1: Analytical instruments

For PXRD analysis, a PANalytical Empyrean (United States) diffractometer was used. The patterns were recorded with CuK $\alpha$  radiation (1.54183 Å) at 40 kV and 30 mA with a step size of 0.026 and a counting time of 0.4 s per point. FTIR spectra collection in a range of 400–4000 cm<sup>-1</sup> with 20 scans at a resolution of 4 cm<sup>-1</sup> was carried out using a Perkin-Elmer (USA) instrument. Raman spectra were collected by an XRD Thermo Fisher Scientific (United States) Raman Microscope. A 780 nm excitation line in backscattering geometry through a 10 $\times$  objective lens was used to excite the samples with a power of ~6 mW (5 s of exposure time and 20 scans for each recorded spectrum). The magnetization curves were recorded at 300 K using an MPMS-3 superconducting quantum interference device magnetometer. To evaluate the thermal stability of the materials was used a T A Instruments, Q5000 IR model (United States), at a heating rate of 10 °C min<sup>-1</sup> under N<sub>2</sub> flow. The evaluation of the superficial charge was measured by zeta potential in a pH 2-6 range using NanoPlus HD sizer equipment (Micrometrics, United States) with a

minimum of 3 measurements per sample at room temperature. The X-ray photoelectron spectroscopy (XPS) analyses were carried out by a K-alpha Thermo Scientific spectrometer (United Kingdom). A spectrometer equipped with a hemispherical analyzer and a monochromatic AlK $\alpha$  X-ray source (1486.6 eV) in the Constant Analyzer Energy (CAE) was used for the study. Spectral backgrounds were subtracted using the Shirley method using CasaXPS software (version 2.3.14), and. The base pressure in the analyzer chamber was  $1 \times 10^{-9}$  mBar. Survey scans were recorded using 400  $\mu$ m spot size and fixed pass energy of 200 eV, whereas high-resolution scans were collected at 20 eV of pass energy. Spectra have been charged corrected to the C 1s spectrum (adventitious carbon) set to 284.8 eV. The Hg(II) concentrations values were determined by triplicate of each sample using an Inductively Coupled Plasma Mass Spectrometer Optima 8000 (ICP-OES, Perkin Elmer, United States).

## Section S2: Adsorption Experiments

**Table S1.** Summary of experimental conditions for Hg(II) adsorption experiments using the magnetic MOF (Zr-MOF@Fe<sub>3</sub>O<sub>4</sub>) as adsorbent.

|                                |                            |           |             |                                              |
|--------------------------------|----------------------------|-----------|-------------|----------------------------------------------|
| <b>[Dye]/mg·L<sup>-1</sup></b> | <b>100</b>                 |           |             |                                              |
| <b>m(adsorbent)/mg</b>         | 30                         | 90        | 30          |                                              |
| <b>Volume/mL</b>               | 30                         | 90        | 30          |                                              |
|                                | <b>Sorbent dosage (mg)</b> | <b>pH</b> | <b>Time</b> | <b>Adsorption Isotherm/mg·L<sup>-1</sup></b> |
|                                | 10                         | 2         | 30          | 30                                           |
|                                | 30                         | 3         | 60          | 50                                           |

|  |    |   |      |     |
|--|----|---|------|-----|
|  | 50 | 4 | 90   | 100 |
|  | 70 | 5 | 120  | 150 |
|  |    | 6 | 180  | 250 |
|  |    |   | 240  | 350 |
|  |    |   | 720  |     |
|  |    |   | 1440 |     |

Section S3: Materials characterization

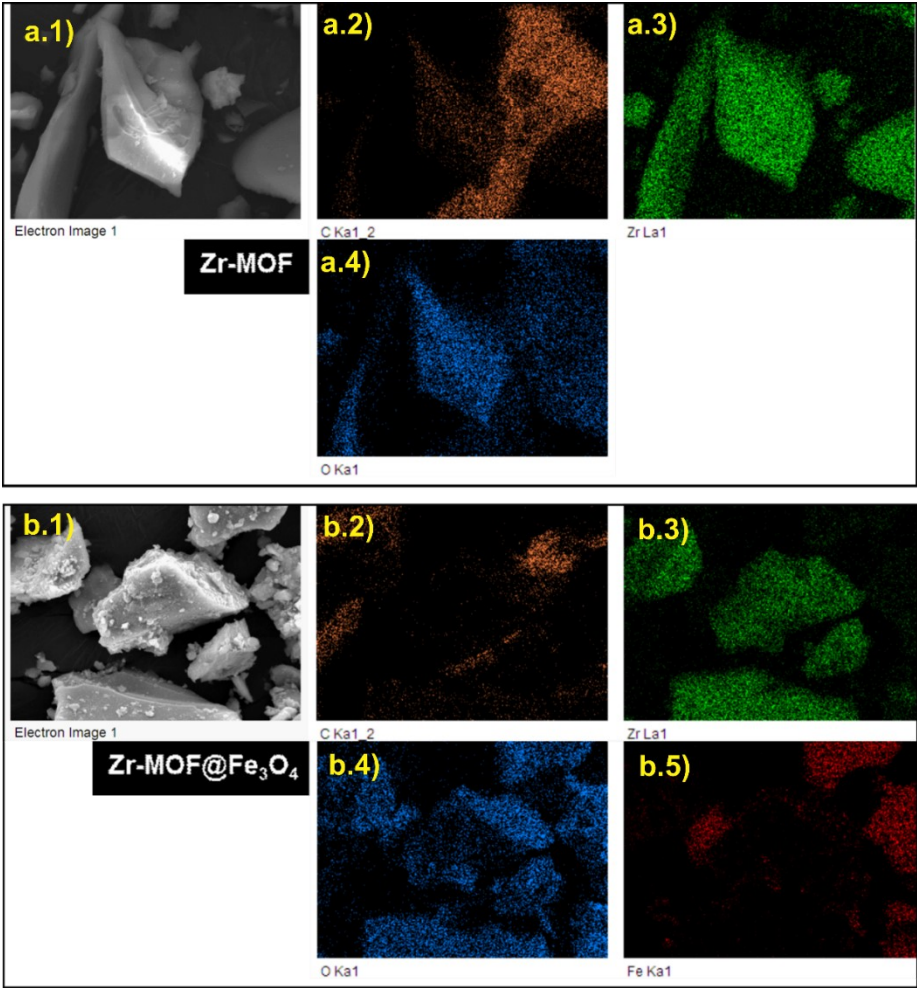

**Figure S1.** SEM micrographs and 2D elemental mapping of a) Zr-MOF and b) Zr-MOF@Fe<sub>3</sub>O<sub>4</sub>.

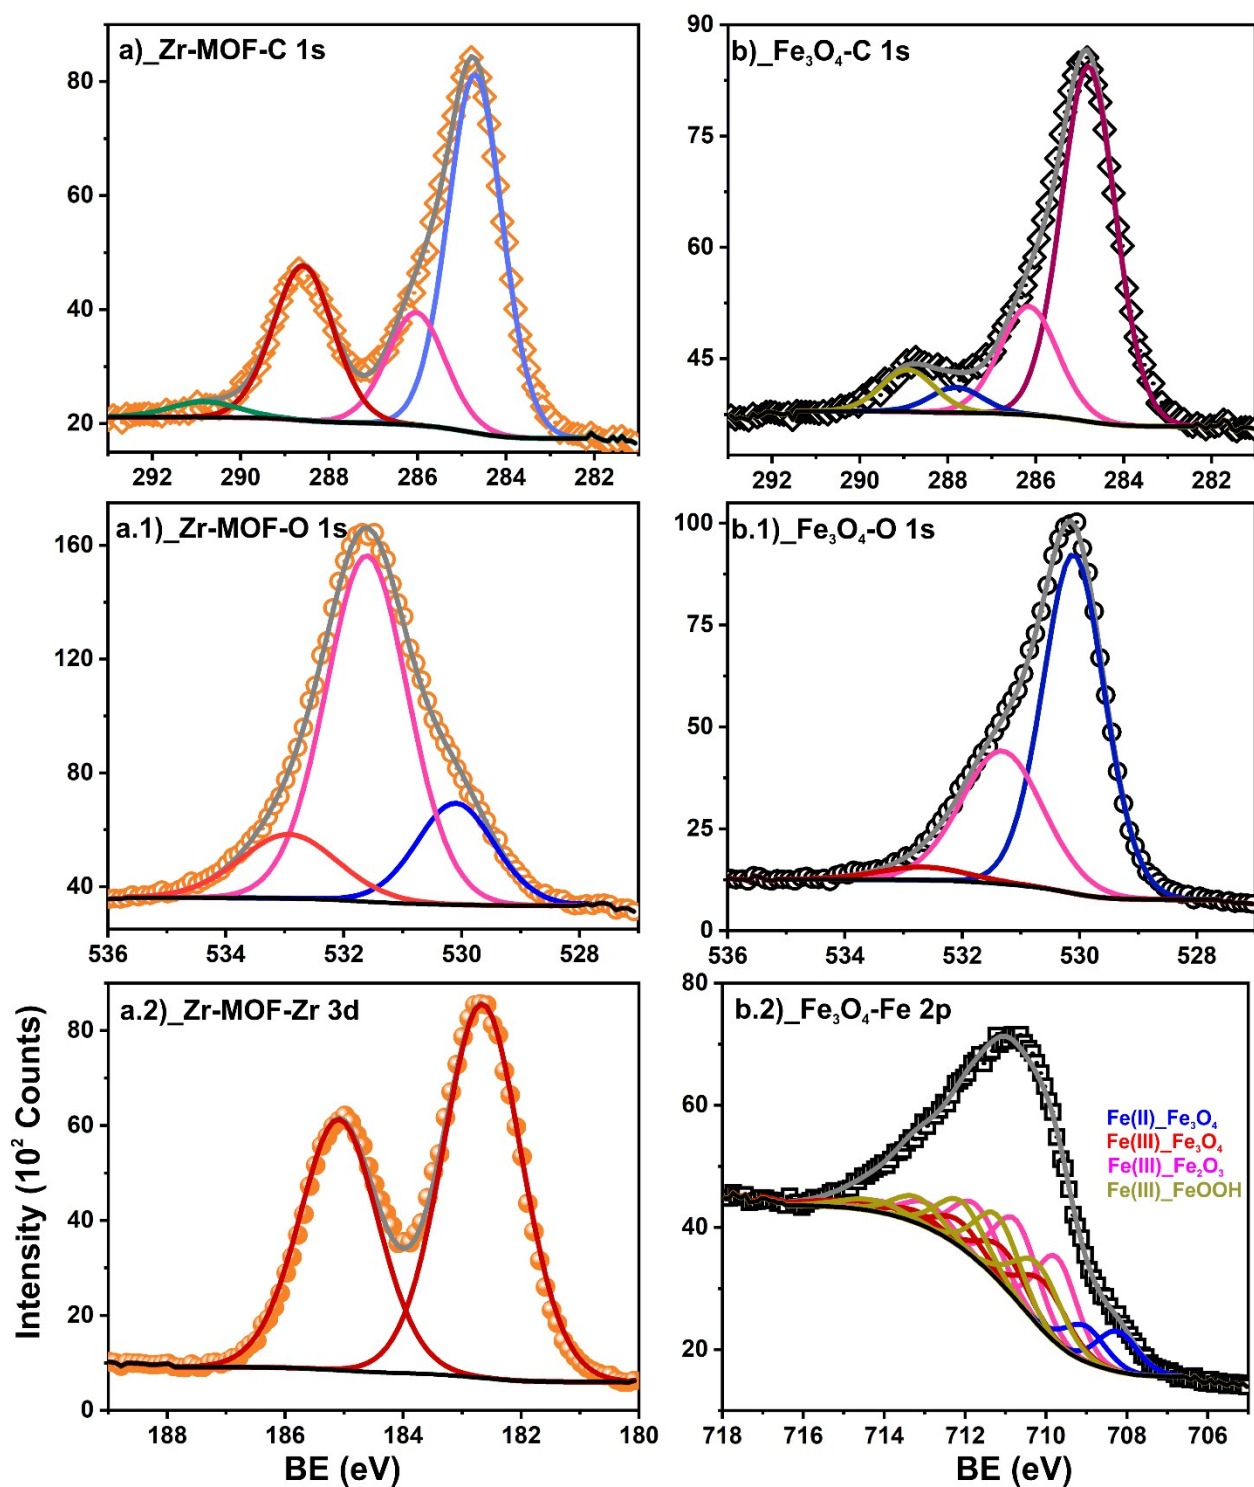

**Figure S2.** HRXPS (a) C 1s; (a.1) O 1s; (a.2) Zr 3d spectra of Zr-MOF; (b) C 1s; (b.1) O 1s; (b.2) Fe 2p spectra of Fe<sub>3</sub>O<sub>4</sub>.

**Table S2.** VSM analysis of Fe<sub>3</sub>O<sub>4</sub> and Zr-MOF@Fe<sub>3</sub>O<sub>4</sub> at T = 300 K.

| Parameters                     | Fe <sub>3</sub> O <sub>4</sub> | Zr-MOF@Fe <sub>3</sub> O <sub>4</sub> |
|--------------------------------|--------------------------------|---------------------------------------|
| $\mu_s$ (emu g <sup>-1</sup> ) | 69.29                          | 25.02                                 |
| $H_c$ (Oe)                     | 8.70                           | 5.18                                  |
| $\mu_r$ (emu g <sup>-1</sup> ) | 0.74                           | 0.15                                  |

#### Section S4: Hg(II) adsorption

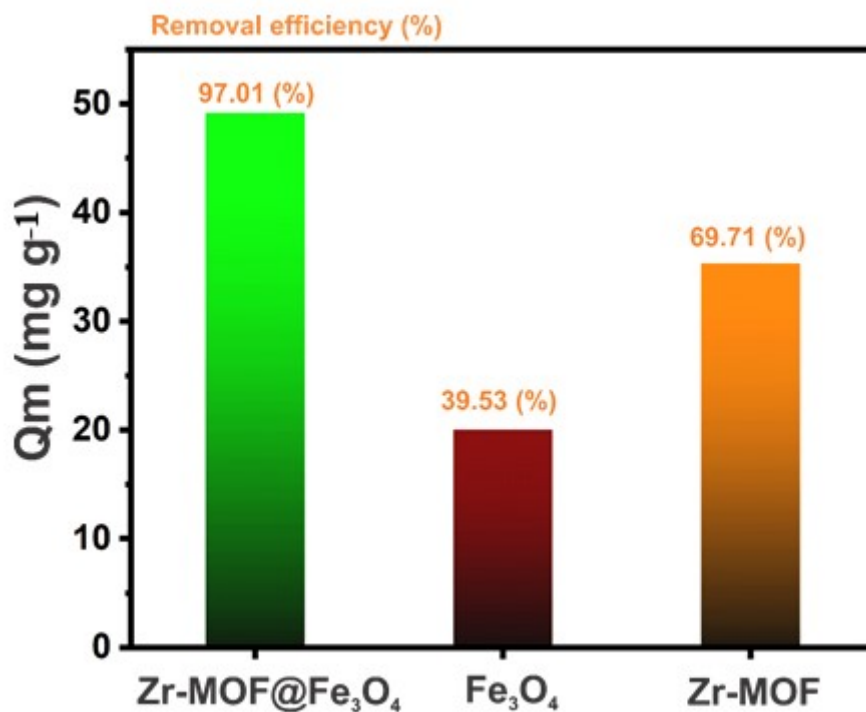

**Figure S3.** Control experiment of Hg(II) adsorption, Zr-MOF@Fe<sub>3</sub>O<sub>4</sub>, Fe<sub>3</sub>O<sub>4</sub>, and Zr-MOF.

**Table S3.** XPS survey data (atomic percentage) for the most concentrated elements for the materials.

| Samples | Elements (At. %) |
|---------|------------------|
|         |                  |

|                                                    | <b>C 1s</b> | <b>O 1s</b> | <b>Zr 3d</b> | <b>Cl 2p</b> | <b>N 1s</b> | <b>S 2p</b> | <b>Fe 2p</b> | <b>Hg 4p</b> |
|----------------------------------------------------|-------------|-------------|--------------|--------------|-------------|-------------|--------------|--------------|
| <b>H<sub>3</sub>BTC</b>                            | 67.8        | 32.2        | -            | -            | -           | -           | -            | -            |
| <b>Zr-Salt</b>                                     | 36.7        | 30.6        | 13.3         | 19.5         | -           | -           | -            | -            |
| <b>Zr-MOF</b>                                      | 56.8        | 34.7        | 7.3          | 1.2          | -           | -           | -            | -            |
| <b>Fe<sub>3</sub>O<sub>4</sub></b>                 | 17.3        | 48.2        | -            | 0.4          | 0.7         | 0.3         | 33.0         | -            |
| <b>Zr-MOF@Fe<sub>3</sub>O<sub>4</sub></b>          | 34.0        | 41.7        | 4.6          | -            | -           | -           | 19.8         | -            |
| <b>Zr-MOF@Fe<sub>3</sub>O<sub>4</sub> + Hg(II)</b> | 33.7        | 45.0        | 2.8          | -            | -           | -           | 17.8         | 0.7          |

**Table S4.** The peak-fitting results of C 1s high-resolution signal of materials.

| <b>Samples</b>                            | <b>Assignment</b>                  | <b>E<sub>B</sub> (eV)</b> | <b>FWHM (eV)</b> | <b>At. %</b> |
|-------------------------------------------|------------------------------------|---------------------------|------------------|--------------|
| <b>Zr-MOF</b>                             | <b>C1s</b> <sub>C=C aromatic</sub> | 284.7                     | 1.4              | 53.5         |
|                                           | <b>C1s</b> <sub>C-O</sub>          | 286.0                     | 1.5              | 18.0         |
|                                           | <b>C1s</b> <sub>O-C=O</sub>        | 288.6                     | 1.6              | 25.5         |
|                                           | <b>C1s</b> <sub>Satellite</sub>    | 290.8                     | 1.8              | 3.0          |
| <b>Fe<sub>3</sub>O<sub>4</sub></b>        | <b>C1s</b> <sub>C-C</sub>          | 284.8                     | 1.4              | 66.1         |
|                                           | <b>C1s</b> <sub>C-O</sub>          | 286.1                     | 1.5              | 21.6         |
|                                           | <b>C1s</b> <sub>C??</sub>          | 287.8                     | 1.4              | 4.6          |
|                                           | <b>C1s</b> <sub>O-C=O</sub>        | 288.9                     | 1.4              | 7.7          |
| <b>Zr-MOF@Fe<sub>3</sub>O<sub>4</sub></b> | <b>C1s</b> <sub>C=C aromatic</sub> | 284.7                     | 1.4              | 55.8         |
|                                           | <b>C1s</b> <sub>C-O</sub>          | 285.9                     | 1.7              | 23.4         |

|                                                    |                                    |       |     |      |
|----------------------------------------------------|------------------------------------|-------|-----|------|
|                                                    | <b>C1s</b> <sub>O-C=O</sub>        | 288.6 | 1.8 | 16.4 |
|                                                    | <b>C1s</b> <sub>Satellite</sub>    | 290.7 | 1.9 | 4.4  |
| <b>Zr-MOF@Fe<sub>3</sub>O<sub>4</sub> + Hg(II)</b> | <b>C1s</b> <sub>C=C aromatic</sub> | 284.7 | 1.5 | 47.3 |
|                                                    | <b>C1s</b> <sub>C-O</sub>          | 285.9 | 1.7 | 30.0 |
|                                                    | <b>C1s</b> <sub>O-C=O</sub>        | 288.4 | 1.8 | 12.9 |
|                                                    | <b>C1s</b> <sub>Satellite</sub>    | 289.5 | 1.9 | 9.7  |

**Table S5.** The peak-fitting results of O 1s high-resolution signal of materials.

| <b>Samples</b>                            | <b>Assignment</b>                | <b>E<sub>B</sub> (eV)</b> | <b>FWHM (eV)</b> | <b>At. %</b> |
|-------------------------------------------|----------------------------------|---------------------------|------------------|--------------|
| <b>H<sub>3</sub>BTC</b>                   | <b>O1s</b> <sub>O-C=O</sub>      | 531.7                     | 1.6              | 42.7         |
|                                           | <b>O1s</b> <sub>-C-OH</sub>      | 533.1                     | 1.9              | 57.3         |
| <b>Zr-Salt</b>                            | <b>O1s</b> <sub>O-Zr</sub>       | 530.6                     | 1.5              | 22.0         |
|                                           | <b>O1s</b> <sub>Zr-OH</sub>      | 532.0                     | 1.8              | 57.6         |
|                                           | <b>O1s</b> <sub>water</sub>      | 533.7                     | 1.9              | 20.5         |
| <b>Zr-MOF</b>                             | <b>O1s</b> <sub>O-Zr</sub>       | 530.1                     | 1.5              | 18.3         |
|                                           | <b>O1s</b> <sub>O-C</sub>        | 531.6                     | 1.6              | 63.5         |
|                                           | <b>O1s</b> <sub>Zr-OH</sub>      | 532.7                     | 1.9              | 18.2         |
| <b>Fe<sub>3</sub>O<sub>4</sub></b>        | <b>O1s</b> <sub>Fe-O</sub>       | 530.1                     | 1.2              | 63.4         |
|                                           | <b>O1s</b> <sub>O-C</sub>        | 531.2                     | 1.6              | 33.1         |
|                                           | <b>O1s</b> <sub>Fe-OH</sub>      | 532.7                     | 1.8              | 3.5          |
| <b>Zr-MOF@Fe<sub>3</sub>O<sub>4</sub></b> | <b>O1s</b> <sub>O-Zr, O-Fe</sub> | 530.2                     | 1.5              | 50.4         |
|                                           | <b>O1s</b> <sub>O-C</sub>        | 531.7                     | 1.6              | 37.7         |
|                                           | <b>O1s</b> <sub>Zr-OH</sub>      | 533.1                     | 1.9              | 11.9         |

|                                                    |                         |       |     |      |
|----------------------------------------------------|-------------------------|-------|-----|------|
| <b>Zr-MOF@Fe<sub>3</sub>O<sub>4</sub> + Hg(II)</b> | <b>O1s</b> O-Zr, O-Fe   | 530.3 | 1.5 | 36.8 |
|                                                    | <b>O1s</b> O-C          | 531.7 | 1.6 | 37.7 |
|                                                    | <b>O1s</b> Zr-OH, Hg-OH | 533.1 | 1.9 | 25.5 |

**Table S6.** The peak-fitting results of Zr 3d<sub>5/2</sub> high-resolution signal of materials.

| Samples                                            | Assignment       | E <sub>B</sub> (eV) | FWHM (eV) | At. % |
|----------------------------------------------------|------------------|---------------------|-----------|-------|
| <b>Zr-Salt</b>                                     | <b>Zr3d</b> Zr-O | 183.2               | 1.7       | 100   |
| <b>Zr-MOF</b>                                      | <b>Zr3d</b> Zr-O | 182.7               | 1.6       | 100   |
| <b>Zr-MOF@Fe<sub>3</sub>O<sub>4</sub></b>          | <b>Zr3d</b> Zr-O | 182.9               | 1.8       | 100   |
| <b>Zr-MOF@Fe<sub>3</sub>O<sub>4</sub> + Hg(II)</b> | <b>Zr3d</b> Zr-O | 183.2               | 1.9       | 100   |

**Table S7.** The peak-fitting results of Fe 2p<sub>3/2</sub> high-resolution signal of materials.

| Samples                                   | Assignment                                                        | E <sub>B</sub> (eV) | FWHM (eV) | At. % | Fe <sup>3+</sup> /Fe <sup>2+</sup> (Magnetite) (2:1) |
|-------------------------------------------|-------------------------------------------------------------------|---------------------|-----------|-------|------------------------------------------------------|
| <b>Fe<sub>3</sub>O<sub>4</sub></b>        | <b>Fe 2p<sub>3/2</sub></b> Fe(II)-Fe <sub>3</sub> O <sub>4</sub>  | 708.2-709.1         | 1.2       | 10.0  | 2.1:1.0                                              |
|                                           | <b>Fe 2p<sub>3/2</sub></b> Fe(III)-Fe <sub>3</sub> O <sub>4</sub> | 710-714.4           | 1.4-3.3   | 21.1  |                                                      |
|                                           | <b>Fe 2p<sub>3/2</sub></b> Fe(III)-Fe <sub>2</sub> O <sub>3</sub> | 709.7-714.1         | 1.2-1.7   | 37.1  |                                                      |
|                                           | <b>Fe 2p<sub>3/2</sub></b> Fe(III)-FeOOH                          | 710.1-714.3         | 1.4-1.8   | 31.8  |                                                      |
| <b>Zr-MOF@Fe<sub>3</sub>O<sub>4</sub></b> | <b>Fe 2p<sub>3/2</sub></b> Fe(II)-Fe <sub>3</sub> O <sub>4</sub>  | 708.3-709.2         | 1.2       | 7.2   | 2.2:1.0                                              |
|                                           | <b>Fe 2p<sub>3/2</sub></b> Fe(III)-Fe <sub>3</sub> O <sub>4</sub> | 710-713.4           | 1.4-3.3   | 15.7  |                                                      |
|                                           | <b>Fe 2p<sub>3/2</sub></b> Fe(III)-Fe <sub>2</sub> O <sub>3</sub> | 709.6-714.1         | 1.2-1.7   | 11    |                                                      |
|                                           | <b>Fe 2p<sub>3/2</sub></b> Fe(III)-FeOOH                          | 710.1-714.3         | 1.4-1.8   | 66.1  |                                                      |

|                                                              |                                                                   |             |         |      |         |
|--------------------------------------------------------------|-------------------------------------------------------------------|-------------|---------|------|---------|
| <b>Zr-MOF@Fe<sub>3</sub>O<sub>4</sub></b><br><b>+ Hg(II)</b> | <b>Fe 2p<sub>3/2</sub></b> Fe(II)-Fe <sub>3</sub> O <sub>4</sub>  | 708.2-709.2 | 1.2     | 4.3  | 2.2:1.0 |
|                                                              | <b>Fe 2p<sub>3/2</sub></b> Fe(III)-Fe <sub>3</sub> O <sub>4</sub> | 710-713.4   | 1.4-3.3 | 9.3  |         |
|                                                              | <b>Fe 2p<sub>3/2</sub></b> Fe(III)-Fe <sub>2</sub> O <sub>3</sub> | 709.6-714.1 | 1.2-1.7 | 9.5  |         |
|                                                              | <b>Fe 2p<sub>3/2</sub></b> Fe(III)-FeOOH                          | 710.1-714.3 | 1.4-1.8 | 76.9 |         |

**Table S8.** The adsorption capacity of reported Zr-based MOFs for Hg(II) removal.

| Adsorbent                           | Experimental conditions |                              |          | $q_e$<br>(mg g <sup>-1</sup> ) |
|-------------------------------------|-------------------------|------------------------------|----------|--------------------------------|
|                                     | pH                      | Hg(II) (mg L <sup>-1</sup> ) | Time (h) |                                |
| PCN-221 <sup>1</sup>                | 7.1                     | 50.00                        | 0.5      | 233.60                         |
| UiO-66-NH <sub>2</sub> <sup>2</sup> | 6.5                     | 13.60                        | 4.0      | 87.30                          |
| DUT-67 (Zr) <sup>3</sup>            | 6.0                     | 0.02                         | 2.0      | 0.04                           |
| Zr-MSA <sup>4</sup>                 | 7.0                     | 10.00                        | 0.1      | 734.00                         |
| UiO-66-DMTD <sup>5</sup>            | 3.0                     | 500.00                       | 10.0     | 670.50                         |
| UiO-66-SH <sup>6</sup>              | 4.0                     | 20.00                        | 1.0      | 785.00                         |
| Thiol-modified Zr-DMBD <sup>7</sup> | 6.0                     | 500.00                       | 6.0      | 171.50                         |
| Magnetic MOF-808<br>[This study]    | 6.0                     | 350.00                       | 24.0     | 302.95                         |

**Table S9.** Kinetic model equations and parameters

| Kinetic model | Linear equation | Parameter |
|---------------|-----------------|-----------|
|---------------|-----------------|-----------|

|                      |                                                                                  |                                                                                                                                                                                                                                                                                                |
|----------------------|----------------------------------------------------------------------------------|------------------------------------------------------------------------------------------------------------------------------------------------------------------------------------------------------------------------------------------------------------------------------------------------|
| <b>PFO model</b>     | $\log (q_e - q_t) = \log (q_e) - \left( \frac{k_{p1}}{2.303} * t \right)$        | $q_e$ : adsorption capacities at equilibrium (mg g <sup>-1</sup> ); $q_t$ : adsorption capacities at time t (mg g <sup>-1</sup> ); $k_{p1}$ : pseudo-first-order rate constant for the kinetic model (mg g <sup>-1</sup> min).                                                                 |
| <b>PSO model</b>     | $\frac{t}{q_t} = \frac{1}{q_e^2 * k_2} + \frac{1}{q_e} * t$ $h = k_{p2} * q_e^2$ | $q_e$ : adsorption capacities at equilibrium (mg g <sup>-1</sup> ); $q_t$ : adsorption capacities at time t (mg g <sup>-1</sup> ); $k_{p2}$ : pseudo-second-order rate constant of adsorption (mg g <sup>-1</sup> min); $h$ : initial adsorption rate (mg g <sup>-1</sup> min <sup>-1</sup> ). |
| <b>Elovich model</b> | $q_t = \frac{1}{\beta} \ln (\alpha * \beta) + \frac{1}{\beta} \ln [t]$           | $q_t$ : adsorption capacities at time t (mg g <sup>-1</sup> ); $\alpha$ : adsorption equilibrium constant (mg g <sup>-1</sup> min <sup>-1</sup> ); $\beta$ : equilibrium constant desorption (g mg <sup>-1</sup> ).                                                                            |
| <b>IPD model</b>     | $q_t = k_{kip} * \sqrt{t} + C_i$                                                 | $q_t$ : adsorption capacities at time t (mg g <sup>-1</sup> ); $Kip$ : rate parameter of stage i (mg g <sup>-1</sup> min <sup>-1/2</sup> ); $C_i$ : intercept of stage i                                                                                                                       |

|  |  |                                                                                       |
|--|--|---------------------------------------------------------------------------------------|
|  |  | that gives an idea about of the thickness of boundary layer<br>(mg g <sup>-1</sup> ). |
|--|--|---------------------------------------------------------------------------------------|

**Table S10.** Kinetic parameters obtained for linear fitting of experimental adsorption data

| Model                | Parameter                                     | Value                |
|----------------------|-----------------------------------------------|----------------------|
| <b>PFO model</b>     | $q_e$ (mg g <sup>-1</sup> )                   | 80.93                |
|                      | $K_1$ (mg g <sup>-1</sup> min)                | $4.8 \times 10^{-4}$ |
|                      | $R^2$                                         | 0.72                 |
| <b>PSO model</b>     | $q_e$ (mg g <sup>-1</sup> )                   | 61.31                |
|                      | $K_2$ (mg g <sup>-1</sup> min <sup>-1</sup> ) | $6.3 \times 10^{-5}$ |
|                      | $R^2$                                         | 0.95                 |
|                      | $h$                                           | 0.24                 |
| <b>Elovich model</b> | $\beta$ (mg g <sup>-1</sup> )                 | 0.083                |
|                      | $\alpha$ (mg g <sup>-1</sup> min)             | 0.75                 |
|                      | $R^2$                                         | 0.96                 |
| <b>IPD model</b>     | $K_{ip1}$ (mg g <sup>-1</sup> min)            | 3.23                 |
|                      | $C_i$ (mg g <sup>-1</sup> )                   | -11.66               |
|                      | $R^2$                                         | 0.99                 |
|                      | $K_{ip2}$ (mg g <sup>-1</sup> min)            | 0.51                 |
|                      | $C_i$ (mg g <sup>-1</sup> )                   | 32.05                |
|                      | $R^2$                                         | 0.81                 |

**Table S11.** Adsorption isotherm equation and parameters

| Isotherm                    | Non-linear equation                                                                                                              | Parameter                                                                                                                                                                                                                                                                                                                                                                                                  |
|-----------------------------|----------------------------------------------------------------------------------------------------------------------------------|------------------------------------------------------------------------------------------------------------------------------------------------------------------------------------------------------------------------------------------------------------------------------------------------------------------------------------------------------------------------------------------------------------|
| <b>Langmuir</b>             | $Q_e = \frac{Q_m K_L C_e}{1 + K_L C_e}$ $R_L = \frac{1}{1 + K_L C_o}$ $\Delta G(kJ/mol) = -RT \ln K_o$ $K_o = K_L * MM * 10^3$   | <p><math>Q_m</math> is maximum adsorption capacity (mg g<sup>-1</sup>); <math>q_e</math>: amount of adsorbate in the adsorbent at equilibrium (mg g<sup>-1</sup>); <math>K_L</math> is adsorption intensity or Langmuir coefficient (L mg<sup>-1</sup>); <math>R_L</math> is separation factor; <math>\Delta G</math> free Gibbs energy (kJ mol<sup>-1</sup>).<br/>MM: Molar mass (g mol<sup>-1</sup>)</p> |
| <b>Freundlich</b>           | $Q_e = K_F C_e^{1/n}$                                                                                                            | <p><math>K_F</math> is the constant indicative of the relative adsorption capacity (L g<sup>-1</sup>) and<br/><math>n</math> is indicative of the intensity</p>                                                                                                                                                                                                                                            |
| <b>Dubinin-Radushkevich</b> | $Q_e = q_s * e^{(-K_{ad} * \varepsilon^2)}$ $\varepsilon = RT * \ln \left[ \frac{100}{1 + 1/C_e} \right]$ $E = 1/\sqrt{2K_{ad}}$ | <p><math>K_{ad}</math>: Dubinin–Radushkevich isotherm constant (mol<sup>2</sup> kJ<sup>-2</sup>); <math>q_e</math>: amount of adsorbate in the adsorbent at equilibrium (mg g<sup>-1</sup>); <math>q_s</math>: theoretical isotherm saturation capacity (mg g<sup>-1</sup>); <math>E</math> is free energy per molecule of adsorbate (kJ mol<sup>-1</sup>)</p>                                             |
| <b>Temkin</b>               | $Q_e = \frac{RT}{bt} * \ln \left[ \frac{100}{At * Ce} \right]$ $B = \frac{RT}{bt}$                                               | <p><math>At</math>: Temkin isotherm equilibrium binding constant (L g<sup>-1</sup>); <math>bt</math>: Temkin isotherm constant; <math>R</math>: universal gas constant (8.314J mol<sup>-1</sup> K<sup>-1</sup>); <math>T</math>: Temperature at 298 K; <math>B</math>:</p>                                                                                                                                 |

|  |  |                                                                |
|--|--|----------------------------------------------------------------|
|  |  | Constant related to heat of sorption (J<br>mol <sup>-1</sup> ) |
|--|--|----------------------------------------------------------------|

**Table S12.** Adsorption isotherm parameters obtained for the non-linear fitting of experimental adsorption data.

| Model                            | Parameter                                     | Value                |
|----------------------------------|-----------------------------------------------|----------------------|
| <b>Langmuir</b>                  | $Q_m$ (mg g <sup>-1</sup> )                   | 512.60               |
|                                  | $K_L$ (L mg <sup>-1</sup> )                   | 0.03                 |
|                                  | $R_L$                                         | 0.09-0.64            |
|                                  | $\Delta G$ (kJ mol <sup>-1</sup> )            | -21.33               |
|                                  | $\chi^2$                                      | 109.92               |
|                                  | $R^2$                                         | 0.97                 |
| <b>Freundlich</b>                | $K_F$ (L g <sup>-1</sup> )                    | 34.07                |
|                                  | $n$                                           | 1.79                 |
|                                  | $\chi^2$                                      | 31.49                |
|                                  | $R^2$                                         | 0.99                 |
| <b>Dubinin-<br/>Radushkevich</b> | $K_{DR}$ (mol <sup>2</sup> kJ <sup>-2</sup> ) | $7.7 \times 10^{-5}$ |
|                                  | $q_s$ (mg g <sup>-1</sup> )                   | 45.58                |
|                                  | $\chi^2$                                      | 3.56                 |
|                                  | $R^2$                                         | 0.95                 |
|                                  | $E$ (kJ mol <sup>-1</sup> )                   | 9.18                 |
| <b>Temkin</b>                    | $A_t$ (L g <sup>-1</sup> )                    | 3.29                 |
|                                  | $b_t$                                         | 51.13                |

|  |          |        |
|--|----------|--------|
|  | $B$      | 48.43  |
|  | $\chi^2$ | 419.19 |
|  | $R^2$    | 0.88   |

## References

- 1 Z. Seyfi Hasankola, R. Rahimi, H. Shayegan, E. Moradi and V. Safarifard, Removal of  $\text{Hg}^{2+}$  heavy metal ion using a highly stable mesoporous porphyrinic zirconium metal-organic framework, *Inorganica Chim. Acta*, 2020, **501**, 119264.
- 2 Y. Zhao, D. Wang, W. Wei, L. Cui, C.-W. Cho and G. Wu, Effective adsorption of mercury by Zr(IV)-based metal-organic frameworks of UiO-66- $\text{NH}_2$  from aqueous solution, *Environ. Sci. Pollut. Res.*, 2021, **28**, 7068–7075.
- 3 S. Chen, F. Feng, S. Li, X.-X. Li and L. Shu, Metal-organic framework DUT-67 (Zr) for adsorptive removal of trace  $\text{Hg}^{2+}$  and  $\text{CH}_3\text{Hg}^+$  in water, *Chem. Speciation Bioavailability*, 2018, **30**, 99–106.
- 4 P. Yang, Y. Shu, Q. Zhuang, Y. Li and J. Gu, A robust MOF-based trap with high-density active alkyl thiol for the super-efficient capture of mercury, *Chem. Commun.*, 2019, **55**, 12972–12975.
- 5 L. Fu, S. Wang, G. Lin, L. Zhang, Q. Liu, J. Fang, C. Wei and G. Liu, Post-functionalization of UiO-66- $\text{NH}_2$  by 2,5-Dimercapto-1,3,4-thiadiazole for the high efficient removal of  $\text{Hg(II)}$  in water, *J. Hazard. Mater.*, 2019, **368**, 42–51.
- 6 J. Li, Y. Liu, Y. Ai, A. Alsaedi, T. Hayat and X. Wang, Combined experimental and theoretical investigation on selective removal of mercury ions by metal organic frameworks modified with thiol groups, *Chem. Eng. J.*, 2018, **354**, 790–801.

- 7 L. Ding, X. Luo, P. Shao, J. Yang and D. Sun, Thiol-functionalized Zr-based metal–organic framework for capture of Hg(II) through a proton exchange reaction, *ACS Sustain. Chem. Eng.*, 2018, **6**, 8494–8502.
